# Supplementary material for: Parametric sensitivity in the Sabatier reaction over Ru/Al2O3 – theoretical determination of the minimal requirements for reactor activation
Source: Royal Society of Chemistry journal article supplement (doi:10.1039/c8re00133b), 2018-11-06
Supplement: c8re00133b1.pdf [file c8re00133b1.pdf]

# Supplementary material for: 'Parametric sensitivity in the Sabatier reaction over Ru/Al<sub>2</sub>O<sub>3</sub> – determination of the minimal requirements for reactor activation'

Emanuele Moioli\*, Noris Gallandat, Andreas Züttel

<sup>a</sup> Laboratory of Materials for Renewable Energy (LMER), Institute of Chemical Sciences and Engineering (ISIC), Basic Science Faculty (SB), École Polytechnique Fédérale de Lausanne (EPFL) Valais/Wallis, Energypolis, Sion, Switzerland

<sup>b</sup> Empa Materials Science & Technology, Dübendorf, Switzerland

The trajectory inside the adiabatic reactor is represented by a straight line in the CO<sub>2</sub> conversion-temperature space.

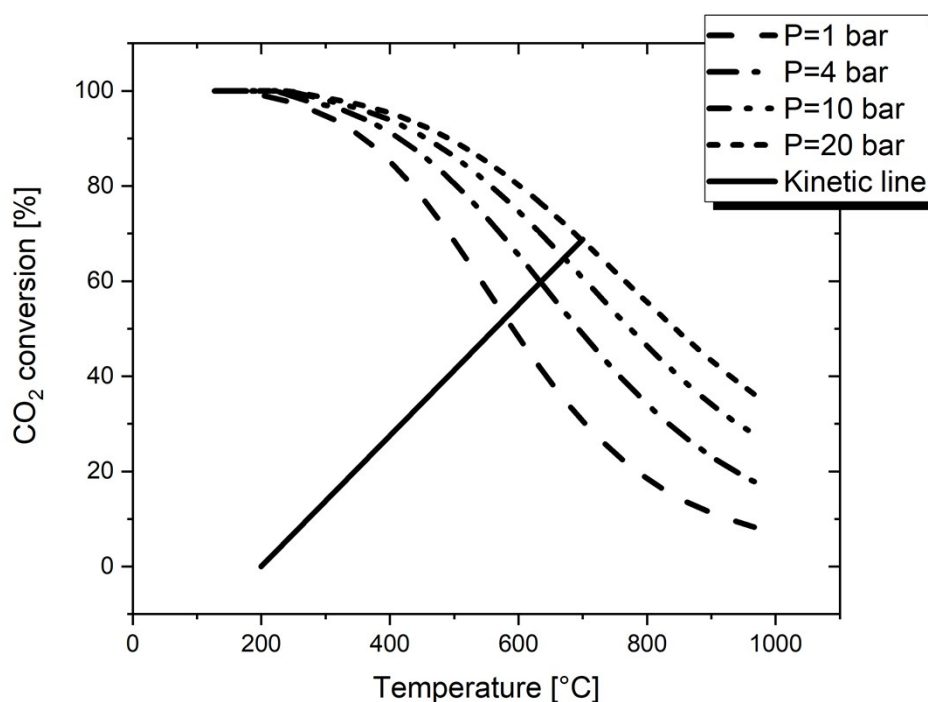

**Fig. S1.** Kinetic line of the adiabatic reactor and thermodynamic equilibrium in the CO<sub>2</sub>-temperature space (equilibrium for the single Sabatier reaction)

The performance of a cooled reactor as a function of the coolant temperature is shown in Fig. S2.

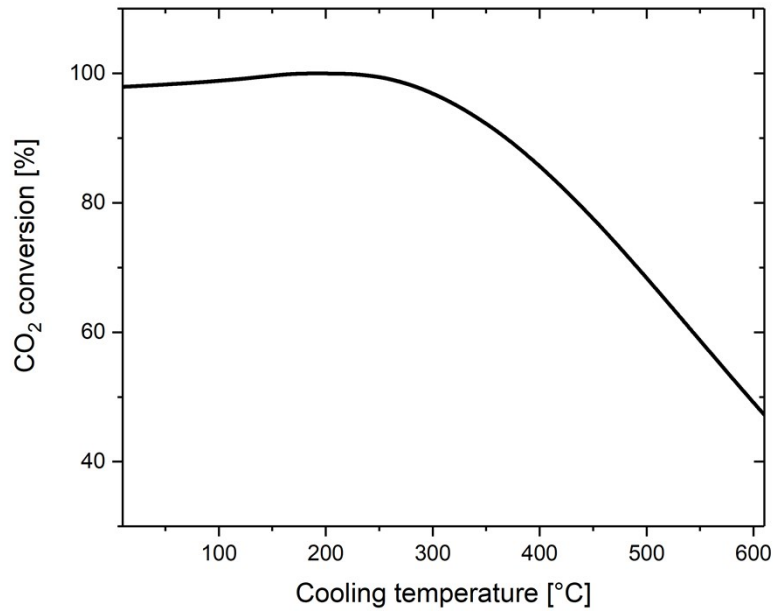

Fig. S2. Effect of cooling temperature on CO<sub>2</sub> conversion ( $T_{in}=250$  °C,  $P=10$  bar,  $GHSV=1500$  h<sup>-1</sup>)

Figure S3 and S4 show the effect of space velocity on the CO<sub>2</sub> conversion varying coolant and inlet temperature. (1500 h<sup>-1</sup> and 800 h<sup>-1</sup> respectively)

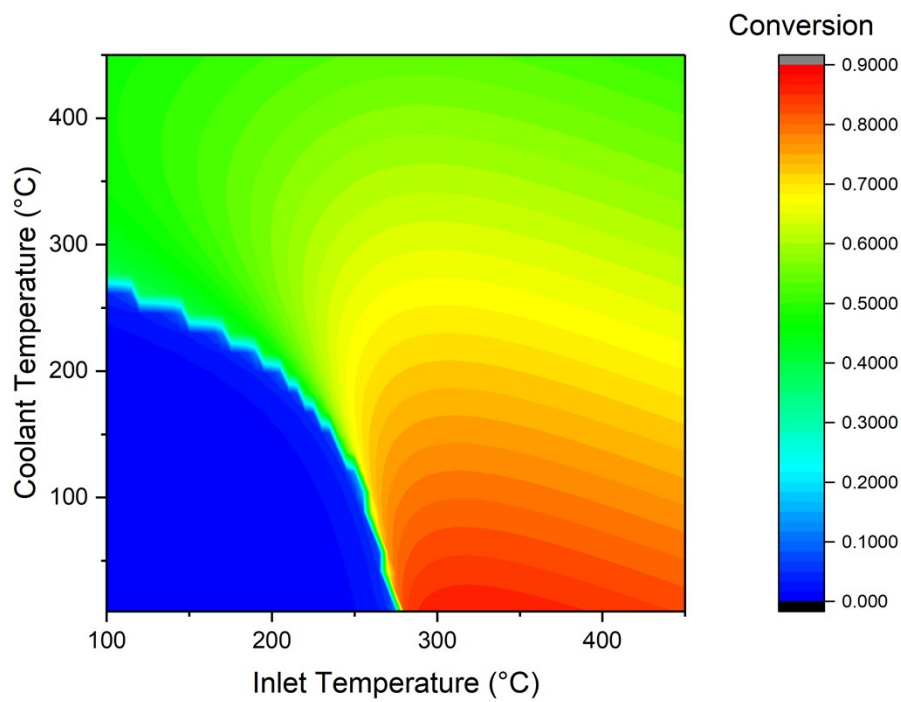

Fig. S3. Effect of coolant and inlet temperature on CO<sub>2</sub> conversion ( $P=10$  bar,  $GHSV=1500$  h<sup>-1</sup>,  $D=0.01$  m)

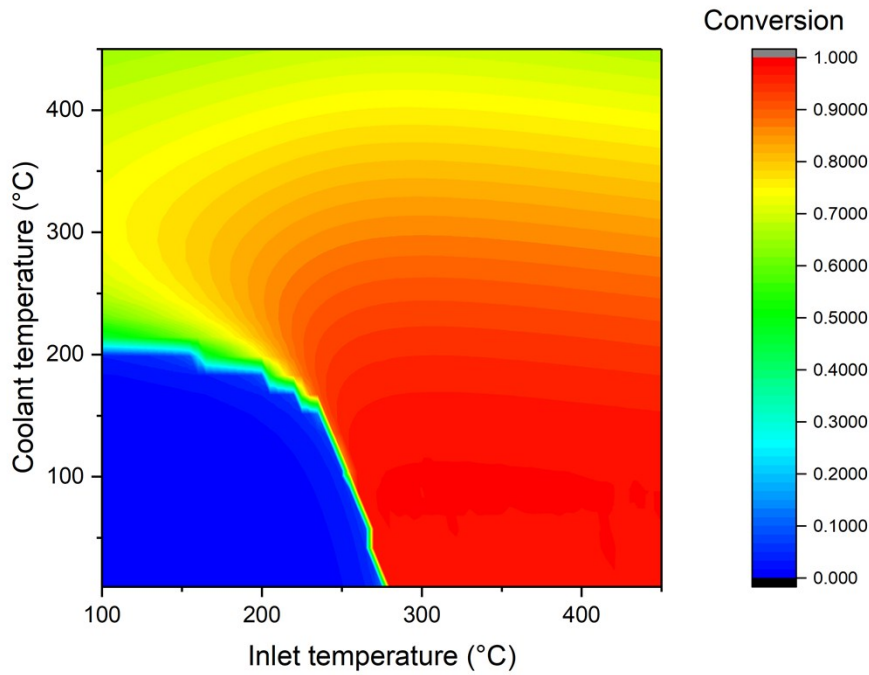

Fig. S4. Effect of coolant and inlet temperature on CO<sub>2</sub> conversion ( $P=10$  bar,  $GHSV=800$  h<sup>-1</sup>,  $D=0.01$  m)

Fig. S5 shows the influence of the split ratio of the feed stream on the CO<sub>2</sub> conversion and hotspot temperature.

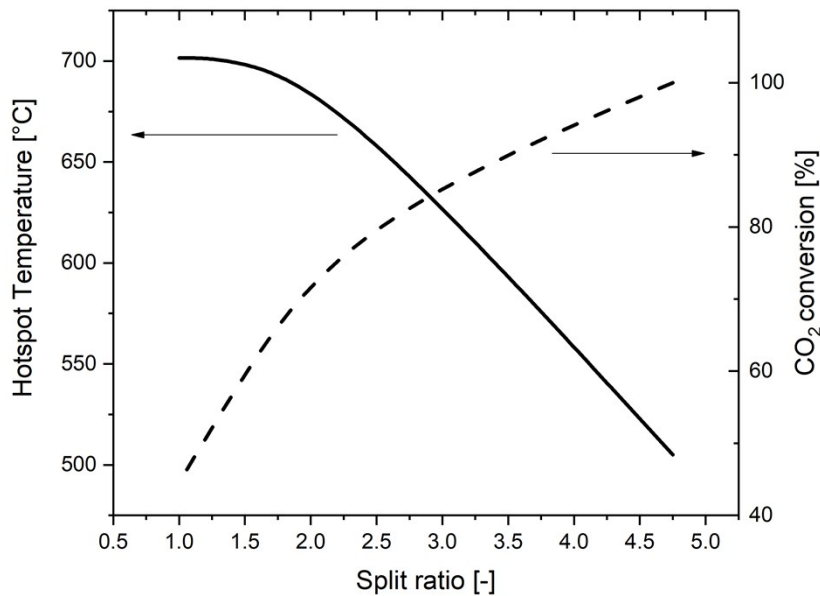

Fig. S5. Influence of split ratio on conversion and hotspot temperature in a single adiabatic stage ( $T_{in}=200$  °C,  $P= 10$  bar,  $GHSV=3000$  h<sup>-1</sup>)
